# Supplementary material for: Development and Validation of a Nomogram-Based Prognostic Model to Predict High Blood Pressure in Children and Adolescents—Findings From 342,736 Individuals in China
Source: PubMed Central journal article supplement (PMC9260112; doi:10.3389/fcvm.2022.884508), 2022-06-23
Supplement: Image_1.pdf [file Image_1.pdf]

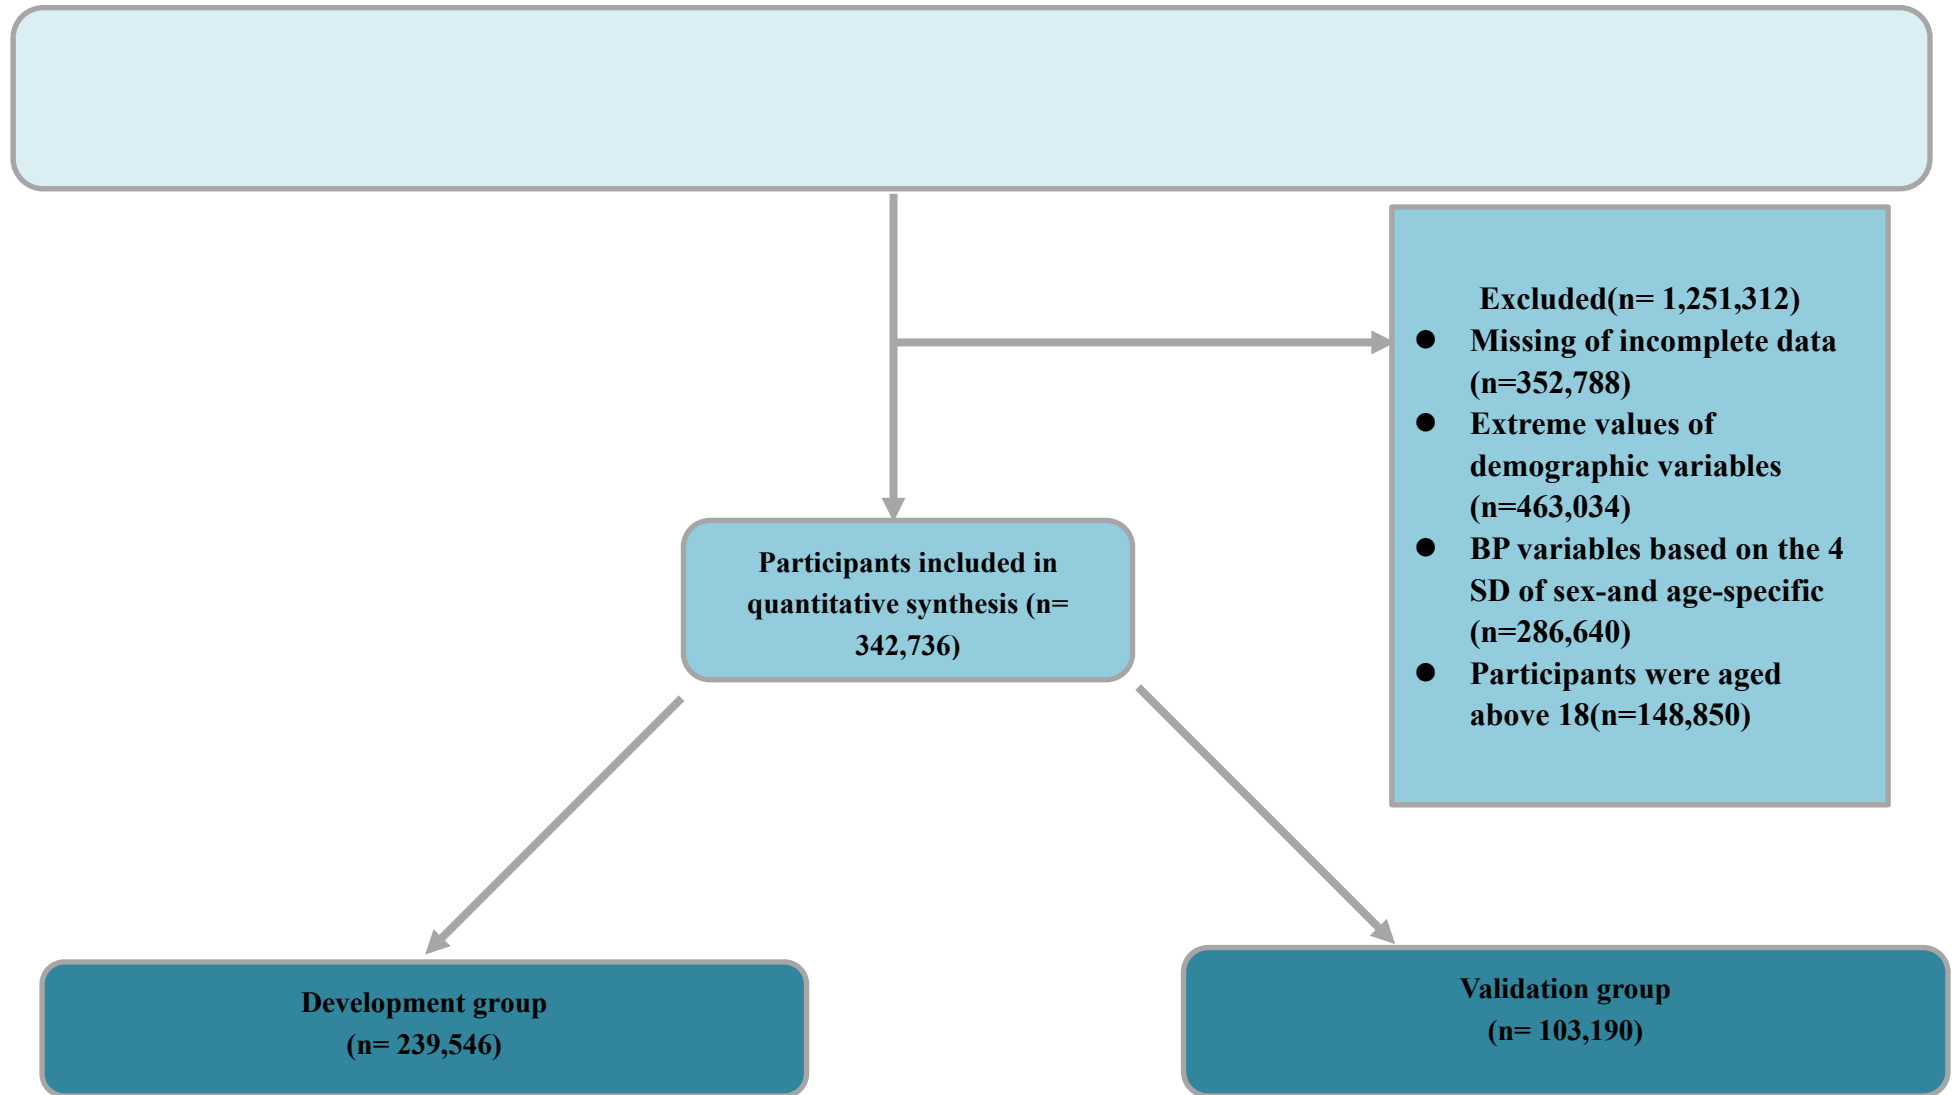

**Supplementary Figure 1** Flow chart illustrating the inclusion and exclusion of participants into the study. BP, Blood pressure; HBP, High blood pressure; SD, Standard deviation.
