# Supplementary material for: Development and Validation of a Nomogram-Based Prognostic Model to Predict High Blood Pressure in Children and Adolescents—Findings From 342,736 Individuals in China
Source: PubMed Central journal article supplement (PMC9260112; doi:10.3389/fcvm.2022.884508), 2022-06-23

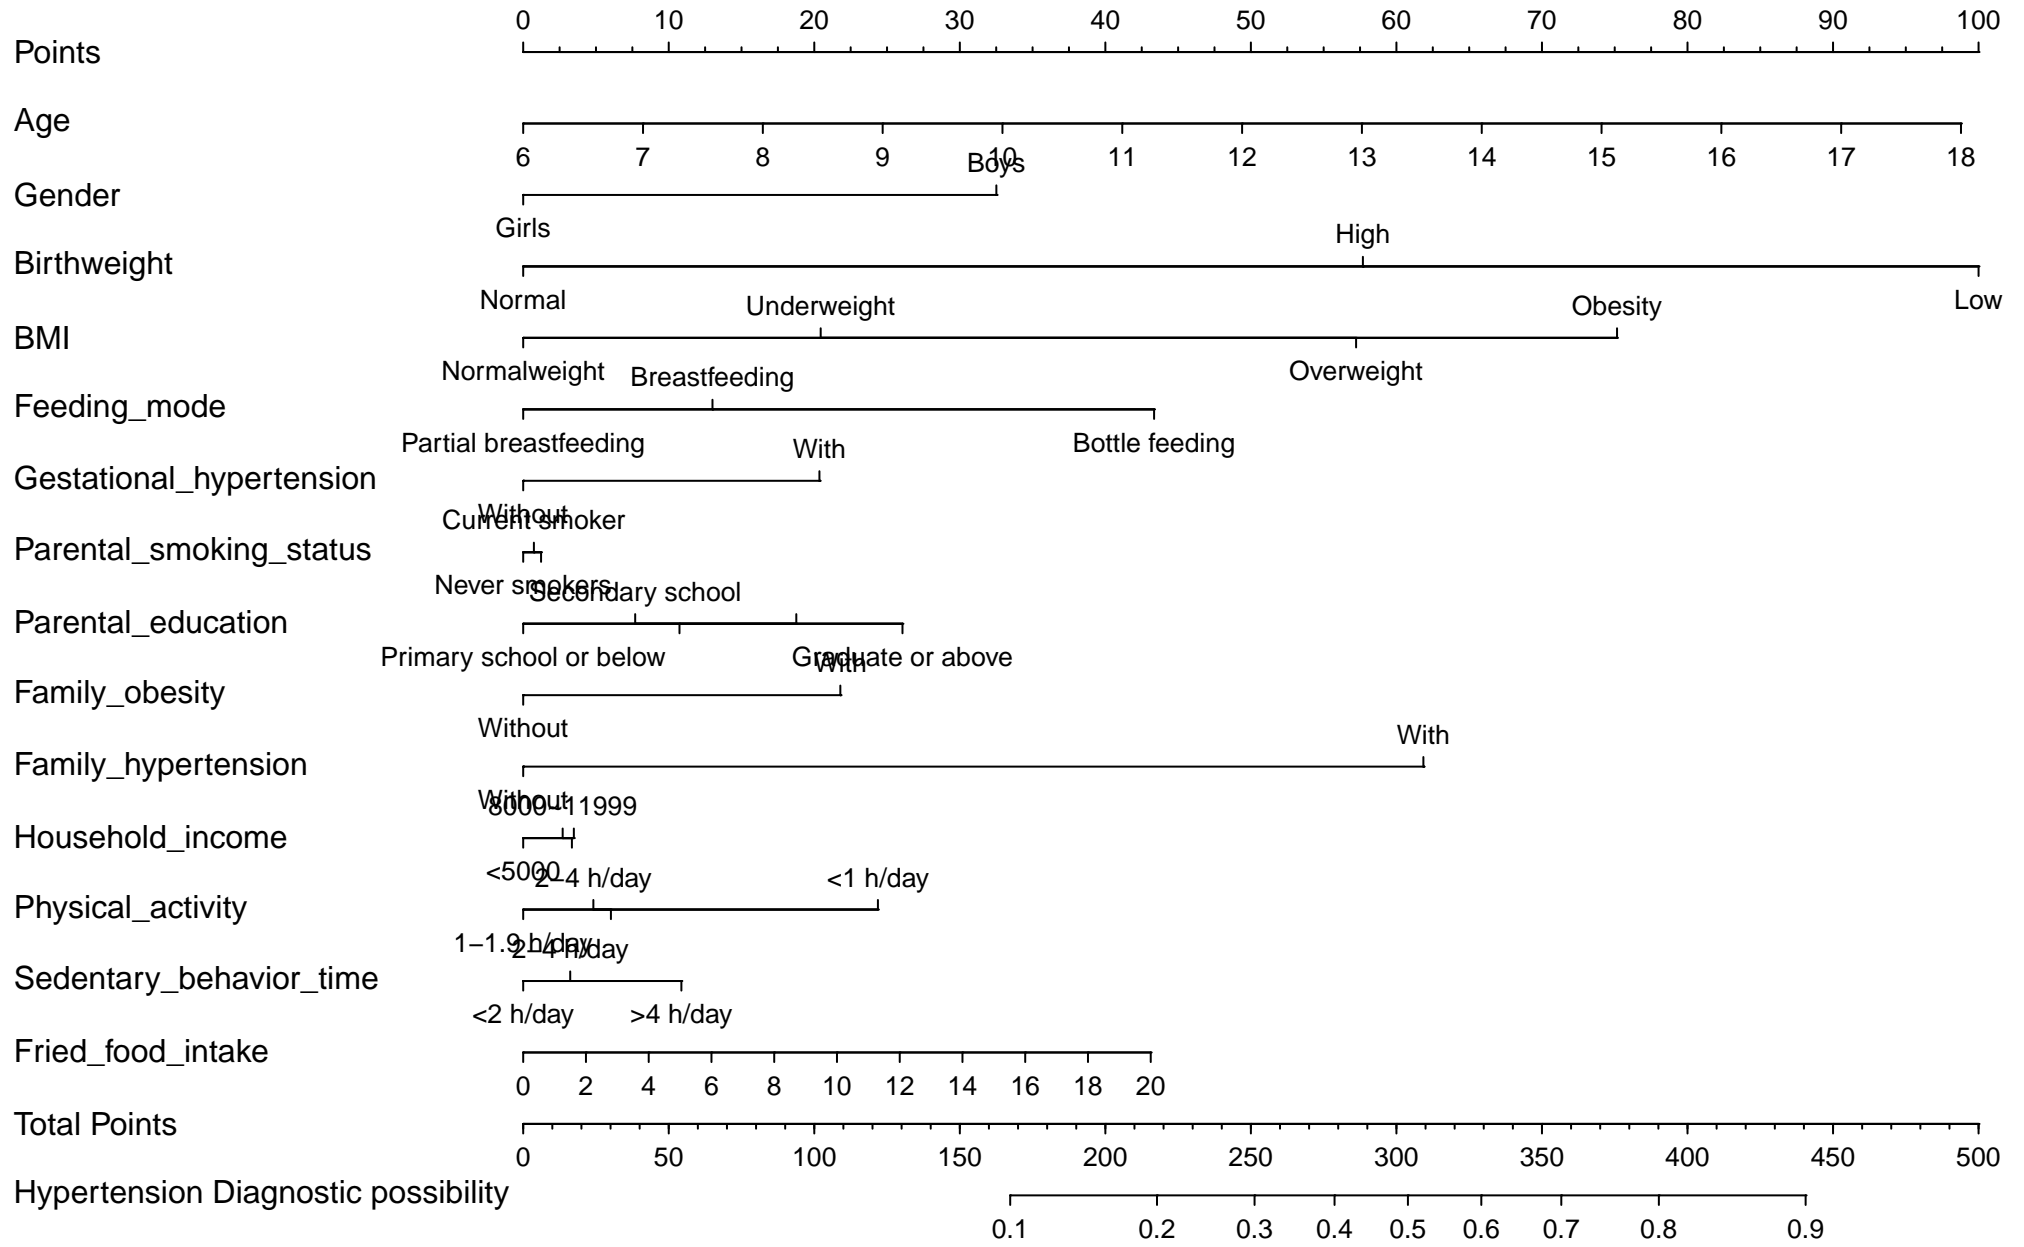

Supplement: Image_2.pdf [file Image_2.pdf]
